# Supplementary material for: Indocyanine Green Angiography in Breast Reconstruction: Utility, Limitations, and Search for Standardization
Source: PubMed Central journal article supplement — Plast Reconstr Surg Glob Open. 2020 Mar 27;8(3):e2694. doi: 10.1097/GOX.0000000000002694 (PMC7253278; doi:10.1097/gox.0000000000002694), 2020-03-27
Supplement: gox-8-e2694-s003.pdf [file gox-8-e2694-s003.pdf]

Supplemental Digital Content 1. List of indocyanine green angiography recording devices and programs.

| Device Name              | Analysis Software        | Company and Location                          |
|--------------------------|--------------------------|-----------------------------------------------|
| Stationary Devices       |                          |                                               |
| SPY® Elite               | SPY-Q Analysis Toolkit   | Stryker<br>San Jose, California               |
| FLARE®                   | Not included             | Curadel LLC<br>Marlborough, Massachusetts     |
| Quest Spectrum™          | Not included             | Quest Medical Imaging<br>Akron, Ohio, USA     |
| Handheld Devices         |                          |                                               |
| PDE-Neo system           | Not included             | Hamamatsu Photonics<br>Hamamatsu City, Japan  |
| IC-View                  | IC-Calc                  | Pulsion Medical Systems AG<br>Munich, Germany |
| Fluobeam®                | Fluobeam v1.47® Software | Fluoptics USA<br>Cambridge, MA                |
| FLOW® 800                | FLOW® 800 Software       | Carl Zeiss Meditec AG<br>Oberkochen, Germany  |
| HyperEye Medical Systems | Not included             | Mizuho Medical<br>Tokyo, Japan                |
