# Supplementary material for: Indocyanine Green Angiography in Breast Reconstruction: Utility, Limitations, and Search for Standardization
Source: PubMed Central journal article supplement — Plast Reconstr Surg Glob Open. 2020 Mar 27;8(3):e2694. doi: 10.1097/GOX.0000000000002694 (PMC7253278; doi:10.1097/gox.0000000000002694), 2020-03-27
Supplement: gox-8-e2694-s004.pdf [file gox-8-e2694-s004.pdf]

## ICG Angiography Protocol

The protocol for ICG angiography at our institution includes a dilution of 1 mg/mL ICG in 9 mL of normal saline. The anesthesiologist administers 3 mL of ICG intravenously followed by 10 mL of normal saline flush. The image of dye emission is captured 8-12 seconds after the saline flush via digital video camera using an infrared filter. The infrared imaging is low energy and has no known potential for damaging the patient's skin. The ICG imaging device used at our institution is the SPY Elite® Imaging System and SPY-Q Analysis Toolkit (Stryker, San Jose, California).
